# Supplementary material for: Evaluation of vitamin D and vitamin B12 levels in children with Familial Mediterranean Fever
Source: Research Square preprint supplement (doi:10.21203/rs.3.rs-7914184/v1), 2025-11-05
Supplement: Supplementary file 1 [file 7df90e15916aa2229972acdc.docx]

| **Table 1. Comparison of case group and control group in terms of general characteristics** | | | |
| --- | --- | --- | --- |
|  | **Case group**  **(n=71)** | **Control group**  **(n=142)** | **p value** |
| **Age, median (min-max)** | 10.0 (18month-18year) | 9.9 (18month-18year) | 0.585a |
| **Age group, n (%)*** |  |  | 0.944b |
| 1 month-≤2 years | 3 (37.5) | 5 (62.5) |  |
| 3-≤5 years | 6 (30.0) | 14 (70.0) |  |
| 6-≤10 years | 28 (31.8) | 60 (68.2) |  |
| 11-≤18 years | 34 (35.1) | 63 (64.9) |  |
| **Gender,** **n (%)*** |  |  | 0.375b |
| Male | 39 (31.0) | 87 (69.0) |  |
| Female | 32 (36.8) | 55 (63.2) |  |
| **Season****, **n (%)*** |  |  | 0.164b |
| Spring | 18(26.9) | 49 (73.1) |  |
| Summer | 15 (27.8) | 39 (72.2) |  |
| Autumn | 23 (44.2) | 29 (55.8) |  |
| Winter | 15 (37.5) | 25 (62.5) |  |

* Row percentage

** Season when vitamin levels are tested

a Mann Whitney U test was used

b Chi Square test was used

| **Table 2. Comparison of the case group and the control group in terms of vitamin D and vitamin B12 levels** | | | |
| --- | --- | --- | --- |
|  | **Case group** | **Control group** | **p value** |
| **Variabl** | **n=71** | **n=142** |  |
| **Serum Vitamin D level (ng/mL) , median / mean±SD** | 18.1 / 19.4±9.5 | 22.6 / 23.2±11.6 | ***0.018a*** |
| **Presence of vitamin D deficiency**/**insufficiency; yes, n (%)*** | 41 (57.7) | 55 (38.7) | ***0.009b*** |
|  | **n=67**** | **n=142** |  |
| **Serum Vitamin B12 level** (**pg/mL), median / mean±SD** | 435.0 / 474.4±208.7 | 405.0 / 439.0±191.0 | 0.190a |
| **Presence of vitamin B12 deficiency**/**insufficiency; yes, n (%)*** | 11 (16.4) | 36 (25.4) | 0.149b |

* Column percentage

** Four patients in the study group did not have recorded serum Vitamin B12 levels.

a Mann Whitney U test was used

b Chi Square test was used

| **Table 3. Comparison of demographic and clinical characteristics with the presence of vitamin D and vitamin B12 deficiency or insufficiency in FMF patients** | | | | | | |
| --- | --- | --- | --- | --- | --- | --- |
| **Variable** | **Total**  **(n=71)** | **Vitamin D deficiency/ insufficiency#** | **p valuea** | **Total**  **(n=67)** | **Vitamin B12 deficiency/ insufficiency#** | **p valuea** |
| **Demographic characteristics** |  |  |  |  |  |  |
| Age (years)* | 10.0 (1.6-18) | 10.3 (1.6-18) | 0.741 | 10.0 (1.6-18) | 13.6 (2.9-18) | 0.267 |
| Gender, male** | 41 | 19 (48.7) | 0.089 | 37 | 6 (16.2) | 0.961 |
| Age at diagnosis (years)* | 6.0 (2-12) | 6.5 (2-12) | 0.920 | 5.8 (2-12) | 7 (2-11.6) | 0.244 |
| Disease duration* | 3.5 (1-12) | 4.0 (1-11) | 0.845 | 3.5 (1-12) | 4.8 (1-9) | 0.732 |
| Duration of use of colchicine* | 4.0 (1-11) | 4.0 (1-11) | 0.868 | 4.0 (1-11) | 5.0 (1-8) | 0.761 |
| **Clinical features#** |  |  |  |  |  |  |
| Abdominal pain** | 64 | 36 (56.3) | 0.694 | 62 | 11 (17.7) | 0.356 |
| Fever** | 41 | 21 (51.2) | 0.234 | 40 | 7 (17.5) | 0.822 |
| Pleuritis** | 15 | 12 (80.0) | ***0.044*** | 13 | 3 (23.1) | 0.678 |
| Myalgia** | 28 | 21 (75.0) | ***0.014*** | 24 | 3 (12.5) | 0.733 |
| Arthralgia** | 31 | 22 (71.0) | ***0.037*** | 27 | 4 (14.8) | 0.737 |
| Arthritis** | 28 | 21 (75.0) | ***0.014*** | 24 | 5 (20.8) | 0.511 |
| Rash** | 12 | 8 (66.7) | 0.464 | 12 | 1 (8.3) | 0.673 |
| Vasculitis** | 9 | 6 (66.7) | 0.723 | 9 | 1 (11.1) | 0.630 |
| **Laboratory findings**# |  |  |  |  |  |  |
| Anemia** | 9 | 5 (55.6) | 0.918 | 9 | 2 (22.2) | 0.638 |
| Leukocytosis** | 18 | 7 (38.9) | 0.069 | 17 | 3 (17.6) | 0.900 |
| Increased sedimentation rate ** | 63 | 35 (55.6) | 0.421 | 60 | 8 (13.3) | 0.053 |
| Increased fibrinogen** | 55 | 30 (54.5) | 0.400 | 52 | 7 (13.5) | 0.227 |
| Proteinuria** | 4 | 3 (75.0) | 0.457 | 4 | 0 | 1.00 |
| Presence of MEFV mutation** | 39 | 25 (64.1) | 0.187 | 37 | 4 (10.8) | 0.191 |
| **Disease severity according to ISSF&**, **mild disease#** | 34 | 17 (51.5) | 0.369 | 33 | 5 (15.2) | 0.741 |

*median (min-max) **n (%), column percentage #Variable present

&ISSF: International severity scoring system for Familial Mediterranean Fever (Severe disease ≥ 6, intermediate disease = 3-5, mild disease ≤ 2)

aChi-square or Fisher Exact test was used to compare categorical data, and Mann Whitney U test was used to compare quantitative data.
